# Supplementary material for: Reference Values for Birth Weight in Relation to Gestational Age in Poland and Comparison with the Global Percentile Standards
Source: MDPI journal article supplement (doi:10.3390/jcm12175736), 2023-09-03
Supplement: s1 [file s1]

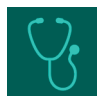

## Supplementary Materials

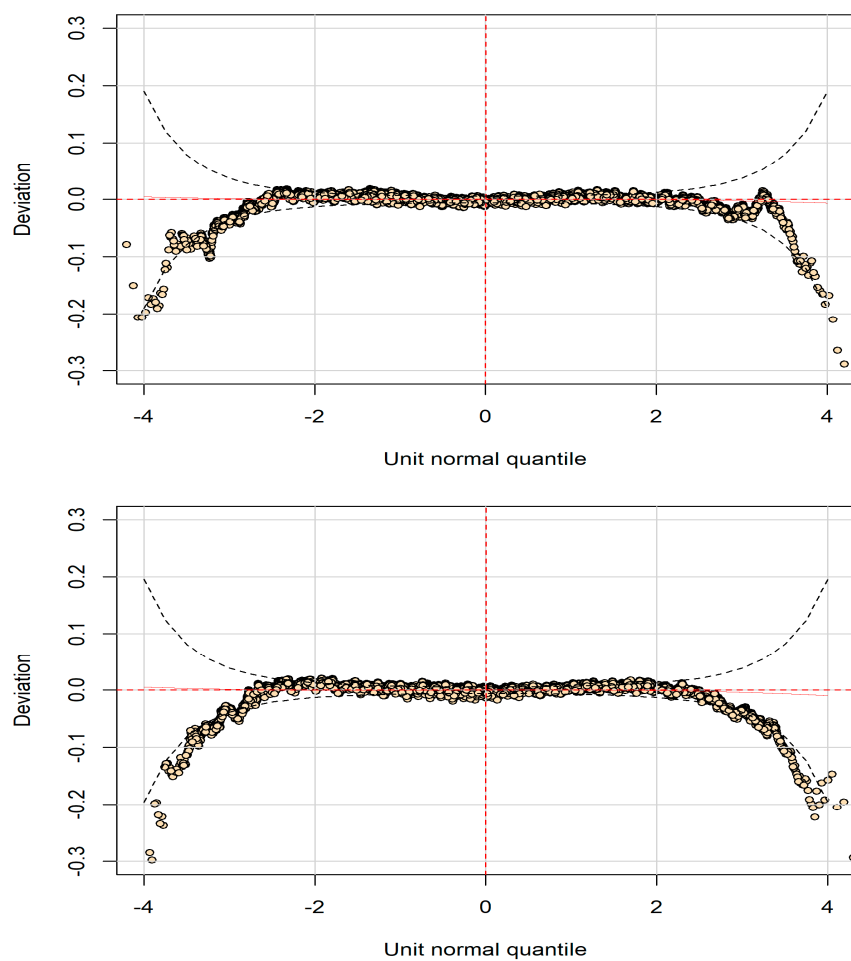

**Figure S1.** Worm plot for the assessment of goodness-to-fit in the data for **boys and girls** (upper and lower panel respectively)

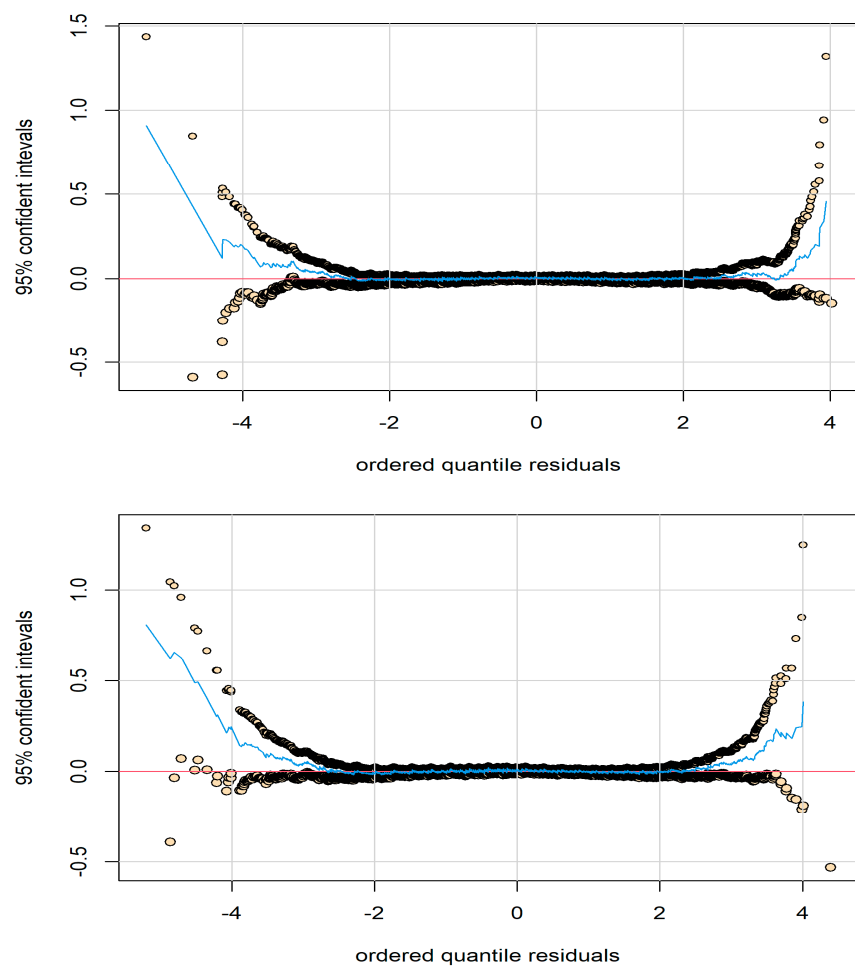

**Figure S2.** Detrended transformed Owen's plot for **boys and girls** (upper and lower panel respectively)

**Table S1.** Normal range of birth weights according to gestational age in singleton live births for **boys** in Poland (2019)

| GA at delivery [weeks] | n= 187,692 | Birth weight [grams] |      |      |      |      |      |      |      |     |
|------------------------|------------|----------------------|------|------|------|------|------|------|------|-----|
|                        |            | Smoothed centiles    |      |      |      |      |      |      | Mean | SD  |
|                        |            | C3                   | C5   | C10  | C50  | C90  | C95  | C97  |      |     |
| 23                     | 53         | 431                  | 456  | 490  | 599  | 724  | 772  | 809  | 599  | 81  |
| 24                     | 82         | 473                  | 507  | 553  | 694  | 845  | 901  | 943  | 704  | 143 |
| 25                     | 96         | 510                  | 556  | 619  | 798  | 978  | 1042 | 1090 | 801  | 142 |
| 26                     | 100        | 543                  | 604  | 685  | 908  | 1121 | 1194 | 1248 | 911  | 164 |
| 27                     | 154        | 581                  | 657  | 758  | 1028 | 1275 | 1358 | 1418 | 1021 | 251 |
| 28                     | 179        | 639                  | 730  | 850  | 1167 | 1449 | 1543 | 1610 | 1136 | 238 |
| 29                     | 204        | 731                  | 834  | 971  | 1333 | 1655 | 1762 | 1839 | 1310 | 289 |
| 30                     | 261        | 860                  | 970  | 1118 | 1517 | 1885 | 2009 | 2098 | 1544 | 293 |
| 31                     | 379        | 1025                 | 1136 | 1287 | 1713 | 2128 | 2271 | 2375 | 1679 | 356 |
| 32                     | 549        | 1218                 | 1326 | 1477 | 1924 | 2385 | 2547 | 2665 | 1949 | 384 |
| 33                     | 808        | 1411                 | 1521 | 1676 | 2149 | 2644 | 2817 | 2943 | 2152 | 417 |
| 34                     | 1351       | 1600                 | 1716 | 1881 | 2383 | 2897 | 3071 | 3196 | 2392 | 404 |
| 35                     | 2340       | 1800                 | 1923 | 2097 | 2626 | 3151 | 3323 | 3443 | 2620 | 441 |
| 36                     | 4915       | 2039                 | 2160 | 2332 | 2870 | 3406 | 3578 | 3697 | 2872 | 433 |
| 37                     | 12,214     | 2320                 | 2430 | 2591 | 3121 | 3671 | 3848 | 3971 | 3125 | 438 |
| 38                     | 35,808     | 2589                 | 2689 | 2840 | 3357 | 3916 | 4096 | 4221 | 3372 | 432 |
| 39                     | 57,841     | 2758                 | 2855 | 3001 | 3509 | 4060 | 4236 | 4356 | 3522 | 421 |
| 40                     | 51,154     | 2874                 | 2972 | 3120 | 3634 | 4181 | 4351 | 4467 | 3644 | 423 |
| 41                     | 18,260     | 2960                 | 3059 | 3209 | 3731 | 4276 | 4442 | 4554 | 3739 | 419 |
| 42                     | 944        | 2976                 | 3074 | 3225 | 3751 | 4304 | 4472 | 4584 | 3754 | 449 |

Abbreviations: C—Centile, GA—gestational age, SD—standard deviation

**Table S2.** Normal range of birth weights according to gestational age in singleton live births for **girls** in Poland (2019)

| GA at delivery [weeks] | n= 177,311 | Birth weight [grams] |      |      |      |      |      |      |      |     |
|------------------------|------------|----------------------|------|------|------|------|------|------|------|-----|
|                        |            | Smoothed centiles    |      |      |      |      |      |      | Mean | SD  |
|                        |            | C3                   | C5   | C10  | C50  | C90  | C95  | C97  |      |     |
| 23                     | 60         | 421                  | 443  | 472  | 557  | 652  | 690  | 721  | 568  | 91  |
| 24                     | 76         | 461                  | 491  | 532  | 650  | 778  | 829  | 869  | 646  | 93  |
| 25                     | 80         | 492                  | 535  | 591  | 751  | 920  | 986  | 1037 | 772  | 139 |
| 26                     | 85         | 518                  | 574  | 650  | 858  | 1072 | 1152 | 1214 | 861  | 209 |
| 27                     | 119        | 555                  | 625  | 719  | 975  | 1231 | 1325 | 1397 | 958  | 220 |
| 28                     | 133        | 622                  | 703  | 811  | 1109 | 1404 | 1511 | 1591 | 1095 | 271 |
| 29                     | 157        | 724                  | 811  | 930  | 1261 | 1591 | 1710 | 1800 | 1261 | 262 |
| 30                     | 223        | 852                  | 944  | 1069 | 1427 | 1794 | 1928 | 2028 | 1437 | 311 |
| 31                     | 278        | 999                  | 1094 | 1224 | 1611 | 2019 | 2169 | 2281 | 1596 | 322 |
| 32                     | 395        | 1154                 | 1253 | 1392 | 1812 | 2266 | 2432 | 2557 | 1853 | 366 |
| 33                     | 632        | 1314                 | 1419 | 1568 | 2025 | 2518 | 2697 | 2830 | 2041 | 422 |
| 34                     | 1070       | 1494                 | 1606 | 1764 | 2254 | 2776 | 2960 | 3095 | 2254 | 402 |
| 35                     | 1899       | 1705                 | 1820 | 1985 | 2501 | 3045 | 3231 | 3366 | 2514 | 446 |
| 36                     | 3999       | 1935                 | 2048 | 2212 | 2739 | 3296 | 3483 | 3615 | 2751 | 441 |
| 37                     | 10,673     | 2200                 | 2306 | 2461 | 2978 | 3531 | 3713 | 3841 | 2987 | 437 |
| 38                     | 32,648     | 2473                 | 2570 | 2714 | 3206 | 3739 | 3911 | 4031 | 3220 | 410 |
| 39                     | 55,190     | 2642                 | 2733 | 2872 | 3354 | 3878 | 4046 | 4161 | 3367 | 402 |
| 40                     | 50,132     | 2757                 | 2848 | 2987 | 3476 | 4003 | 4168 | 4280 | 3488 | 404 |
| 41                     | 18,448     | 2845                 | 2936 | 3076 | 3570 | 4095 | 4256 | 4365 | 3580 | 402 |
| 42                     | 1014       | 2852                 | 2946 | 3089 | 3595 | 4126 | 4287 | 4394 | 3597 | 416 |

Abbreviations: C—Centile, GA—gestational age, SD—standard deviation

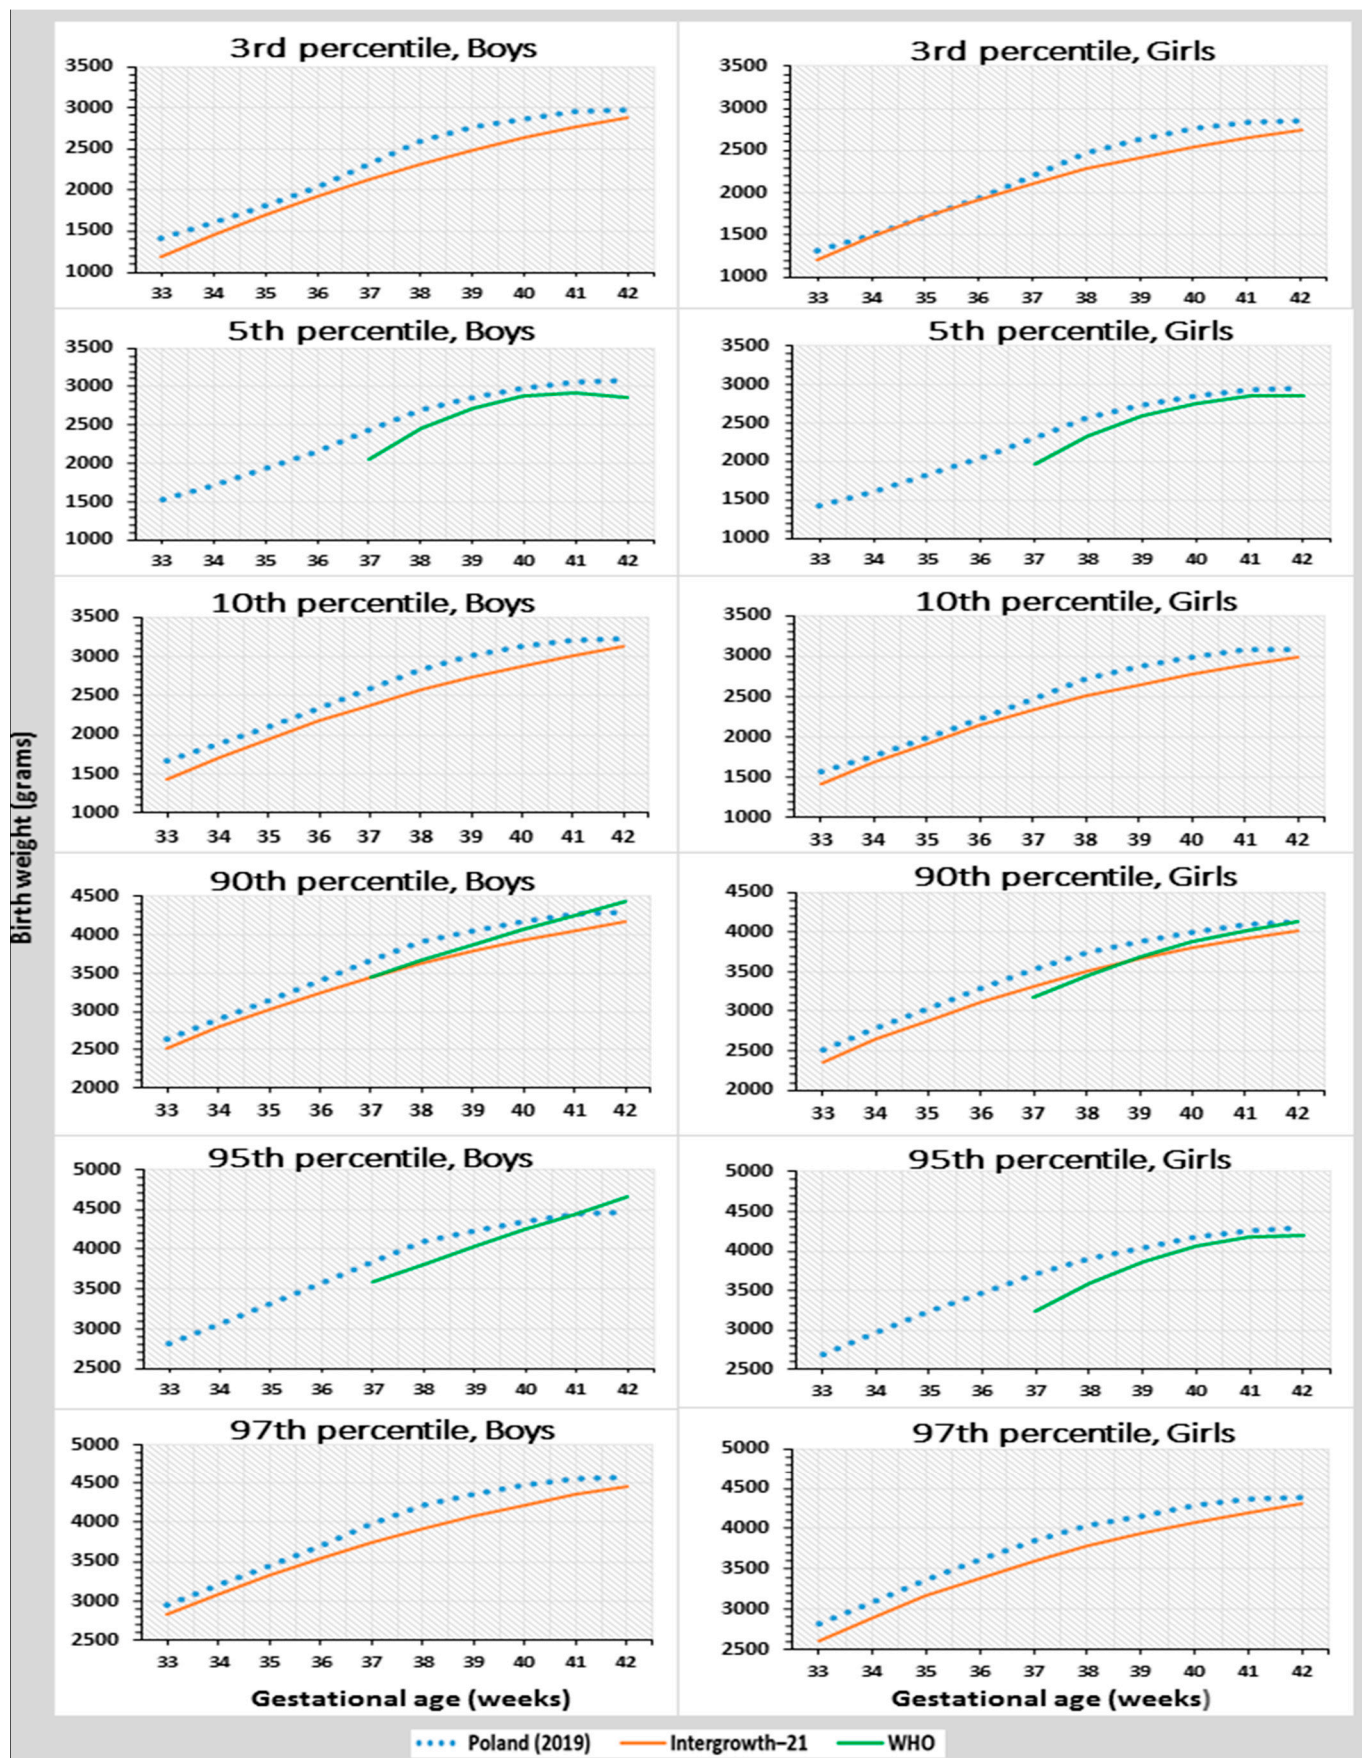

**Figure S3.** Birth weight at the 3<sup>rd</sup>, 5<sup>th</sup>, 10<sup>th</sup>, 90<sup>th</sup>, 95<sup>th</sup>, 97<sup>th</sup> percentiles based on gestational age among Polish newborns from singleton pregnancies, in comparison with the global references INTERGROWTH-21 and WHO
